# Supplementary material
Source: publisher figshare collection journal article supplement (https://acs.figshare.com/ndownloader/files/4078783)
Supplement: Supplementary file 1 [file 4078783]

**Figure S1**

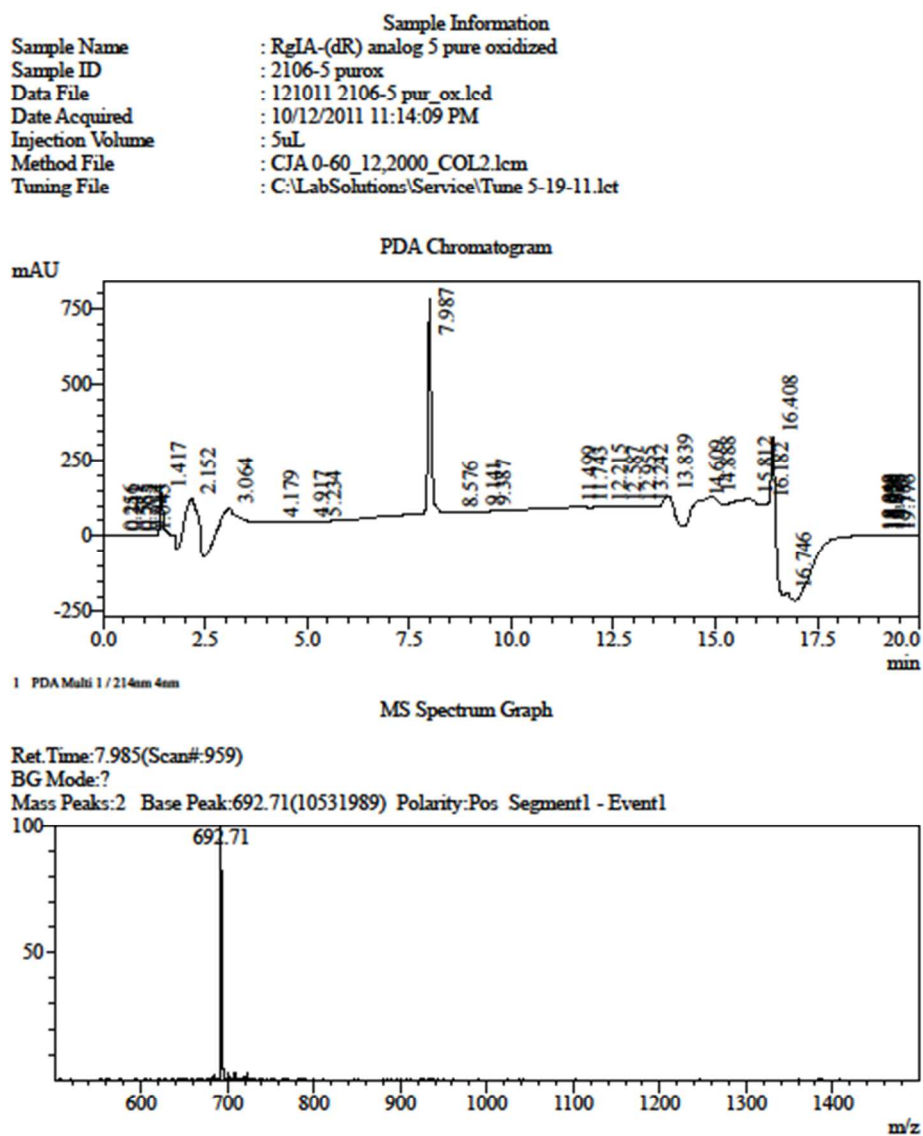

**Figure S1.** Analytical LC-MS data for compound **5**. (top) UV analytical HPLC trace detected at 214 nm. The final mass was calculated from the observed  $[M+2H]/2$  peak. Observed, 1383.40; calculated 1383.40

**Figure S2**

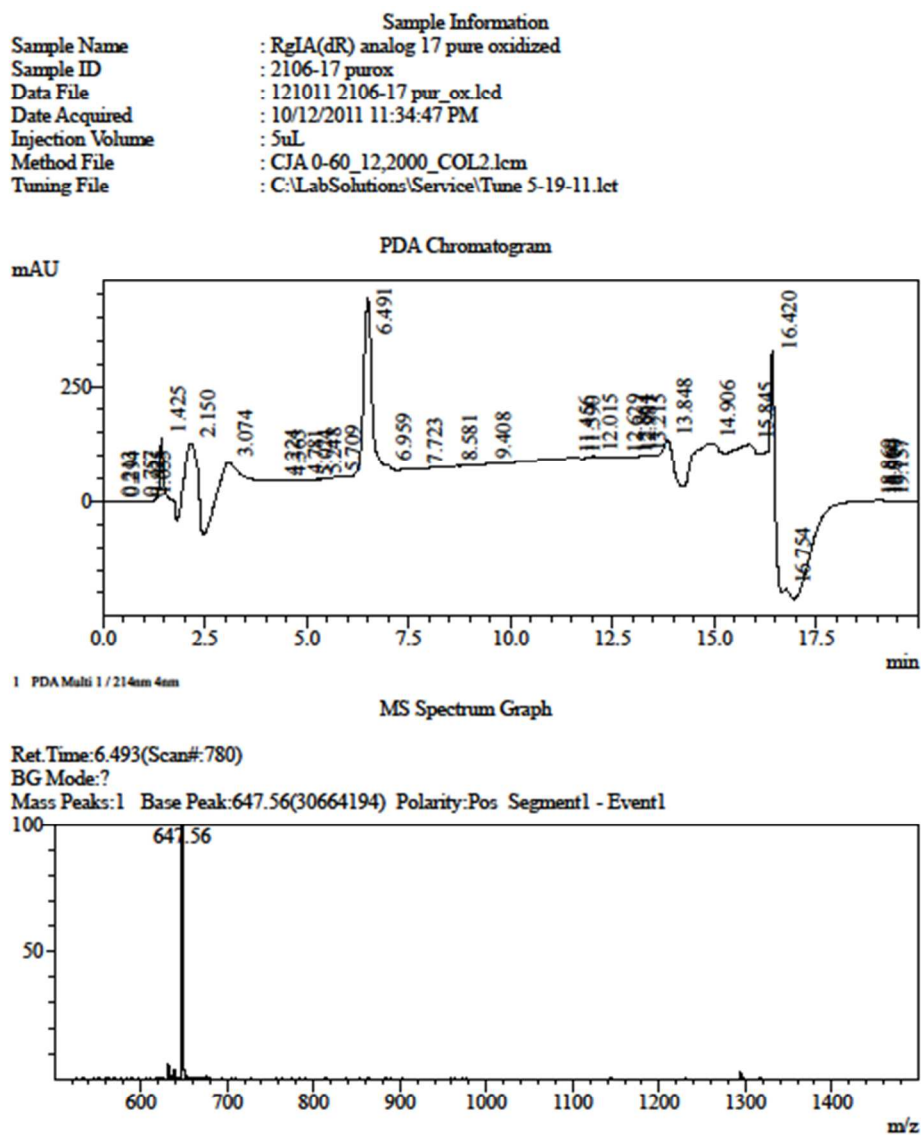

**Figure S2.** Analytical LC-MS data for compound **17**. (top) UV analytical HPLC trace detected at 214 nm. The final mass was calculated from the observed  $[M+2H]/2$  peak. Observed, 1293.10; calculated 1293.45.

**Figure S3**

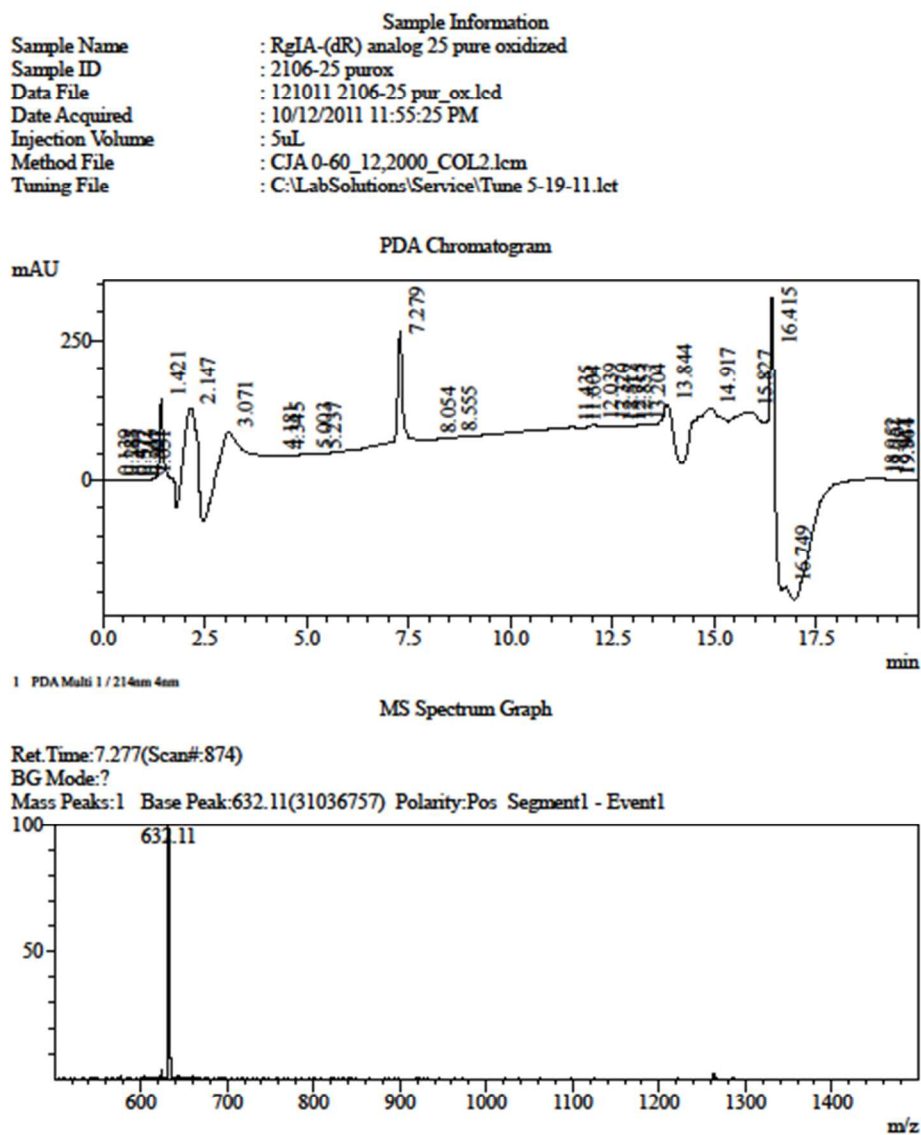

**Figure S3.** Analytical LC-MS data for compound **25**. (top) UV analytical HPLC trace detected at 214 nm; (bottom) ESI mass spectra. The final mass was calculated from the observed  $[M+2H]/2$  peak. Observed, 1262.50; calculated 1262.20

**Figure S4**

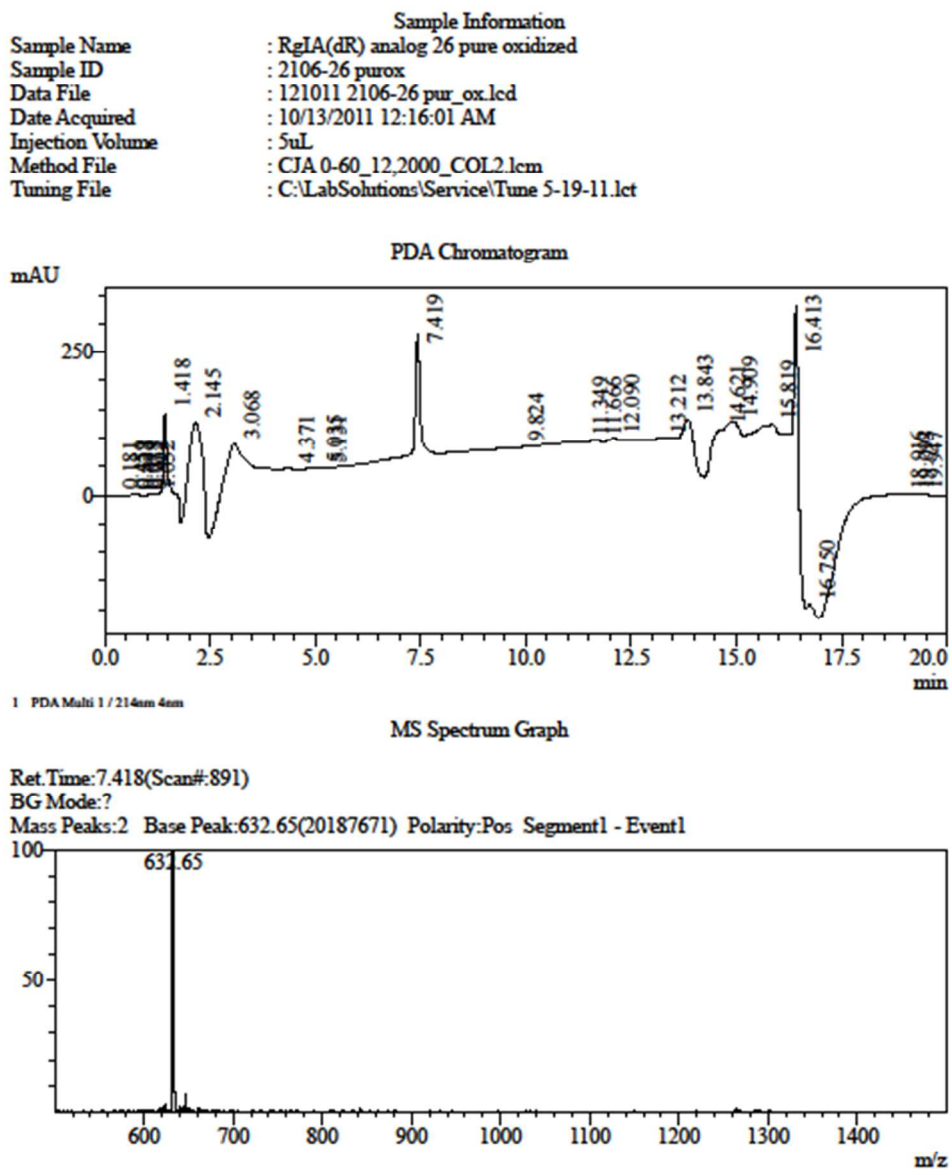

**Figure S4.** Analytical LC-MS data for compound **26**. (top) UV analytical HPLC trace detected at 214 nm; (bottom) ESI mass spectra. The final mass was calculated from the observed  $[M+2H]/2$  peak. Observed, 1262.50; calculated 1262.20

**Figure S5**

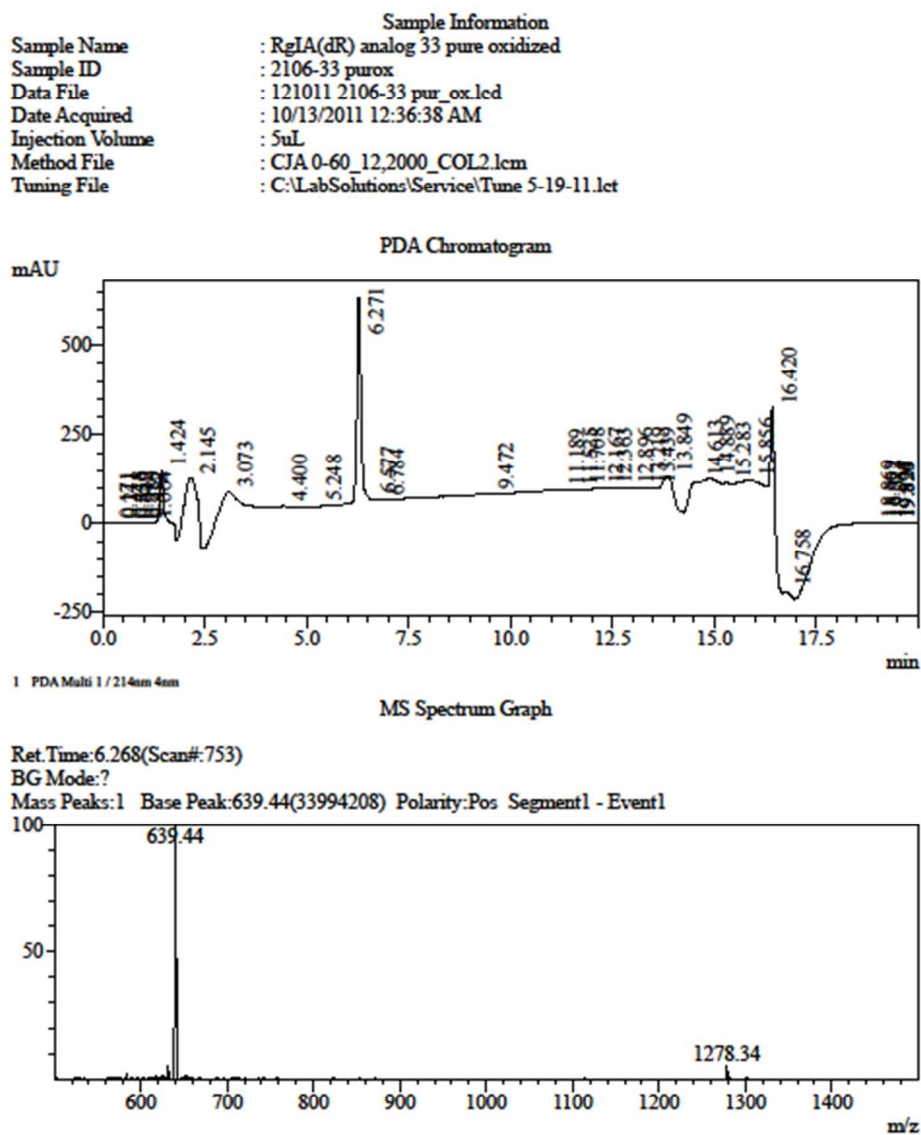

**Figure S5.** Analytical LC-MS data for compound **33**. (top) UV analytical HPLC trace detected at 214 nm; (bottom) ESI mass spectra. The final mass was calculated from the observed  $[M+2H]/2$  peak. Found, 1277.48; calculated 1277.48

**Figure S6**

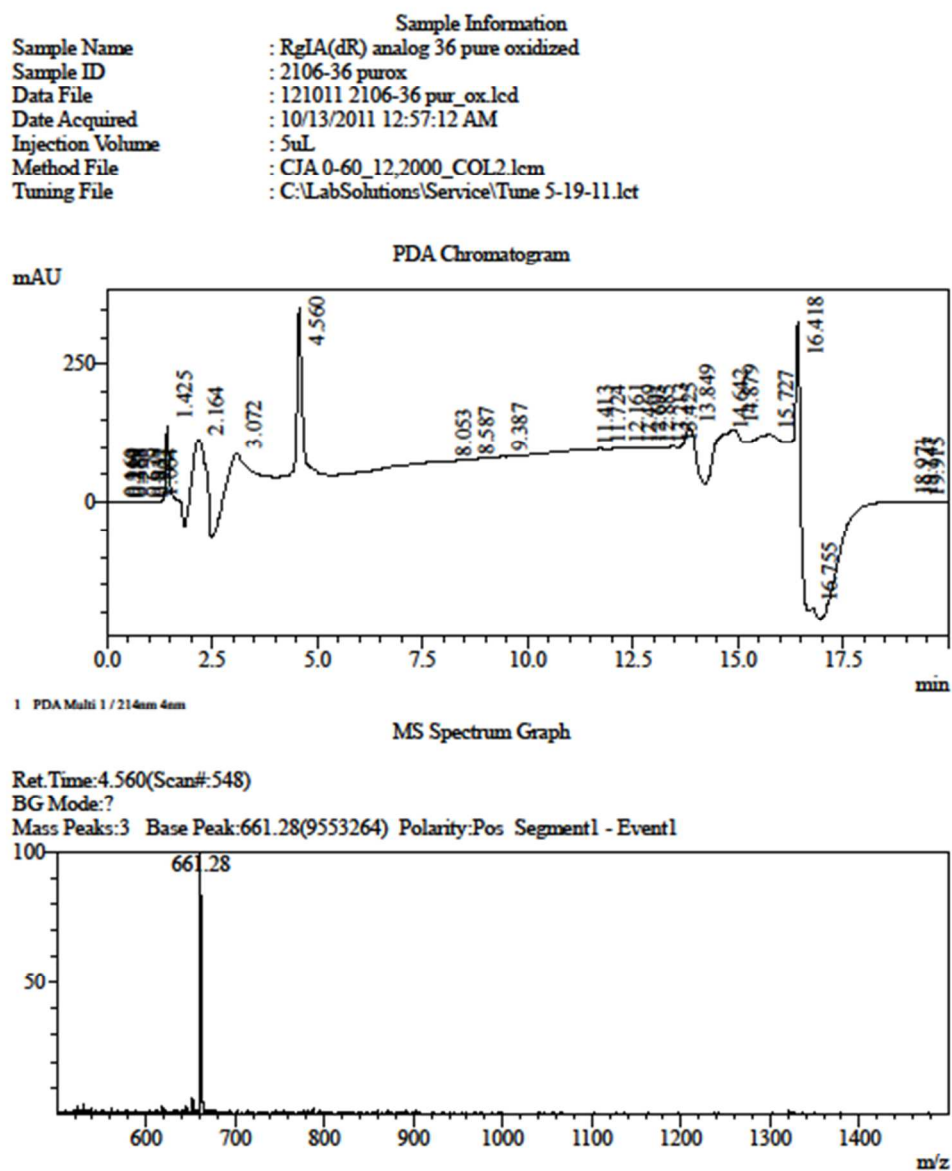

**Figure S6.** Analytical LC-MS data for compound **36**. (top) UV analytical HPLC trace detected at 214 nm; (bottom) ESI mass spectra. The final mass was calculated from the observed  $[M+2H]/2$  peak. Found, 1320.54; calculated 1320.49
